# Supplementary material
Source: Research Square preprint supplement (doi:10.21203/rs.3.rs-8998093/v1)
Supplement: Supplementary file 1 [file 0d0b265c49a40e93d6194a70.docx]

**Scheme (1): Suggested degradation pathway of Remdesivir affected by NaOH.**

**
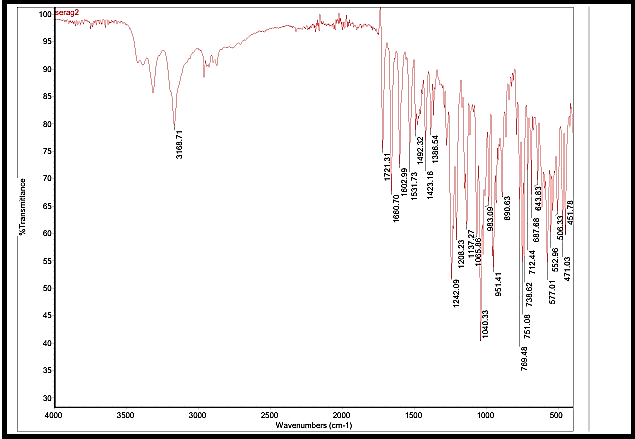
**

**Figure (2): IR spectrum of intact Remdesivir.**


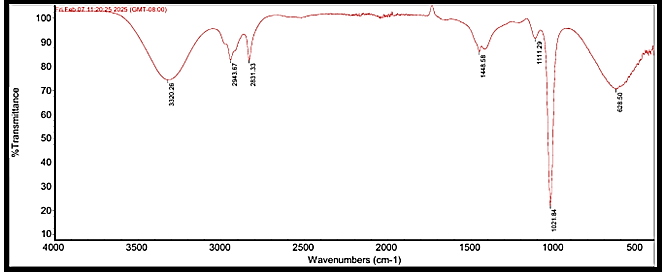


**Figure (3): IR spectrum of** **Remdesivir degradation product.**

**
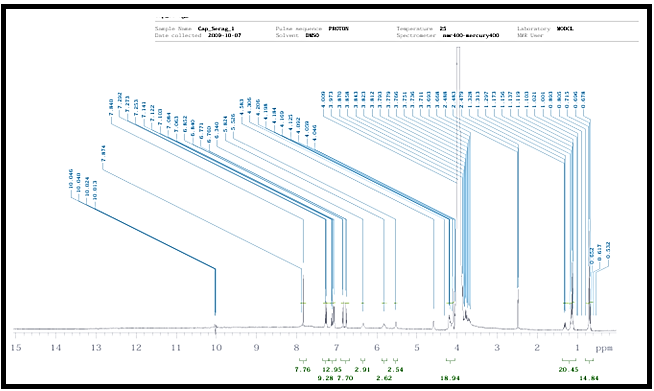
**

**Figure (4): 1H NMR spectrum of intact Remdesivir in (DMSO).**


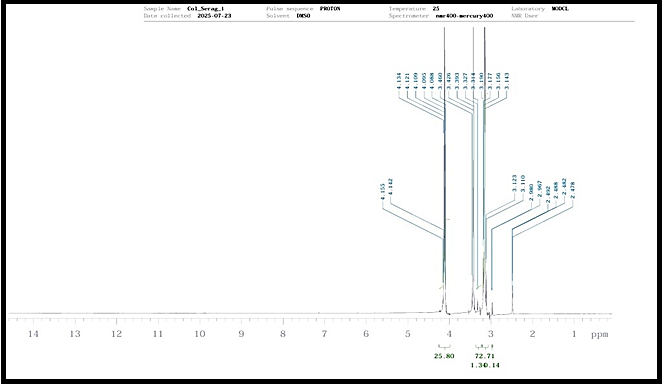


**Figure (5): 1H NMR spectrum of** **Remdesivir degradation product in (DMSO).**

**
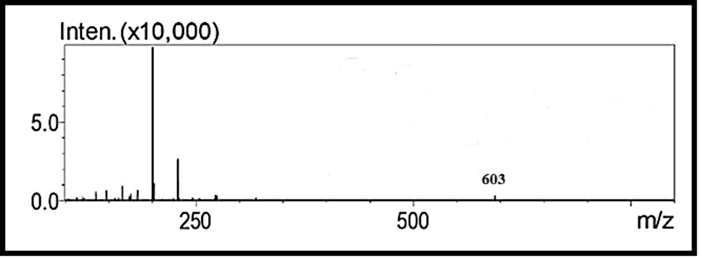

Figure (6): Mass spectrum of intact Remdesivir.**

**
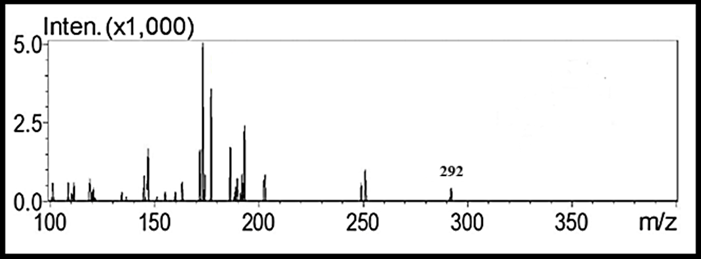
**

**Figure (7): Mass spectrum of** **Remdesivir degradation product**


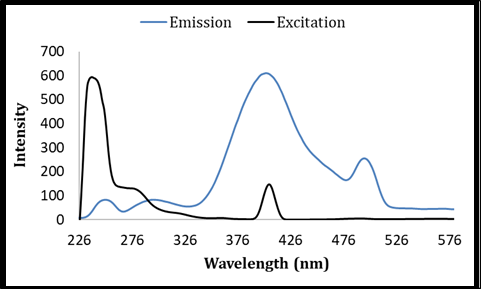


**Figure (8): (A) Excitation, (B) emission spectra of Remdesivir (800 ng/ml).**


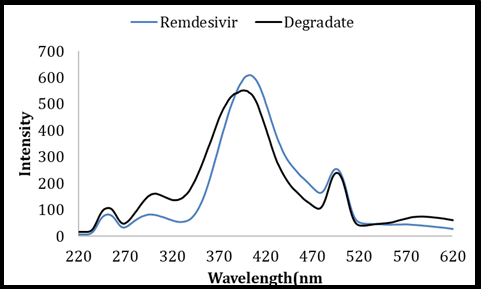


**Figure (9): Emission spectra of (A) Remdesivir (800 ng/ml), (B) Remdesivir degradation product (800 ng/ml) .**


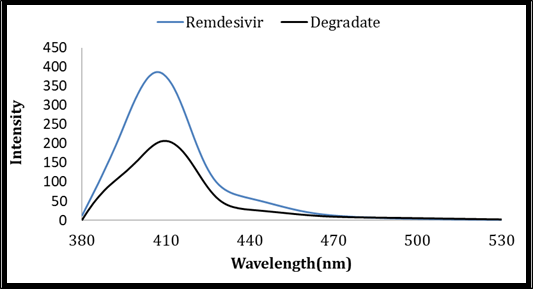


**Figure (10): Synchronous fluorescence spectra of (A) Remdesivir (800 ng/ml), (B) Remdesivir degradation product (800 ng/ml) using Δλ=160 nm.**


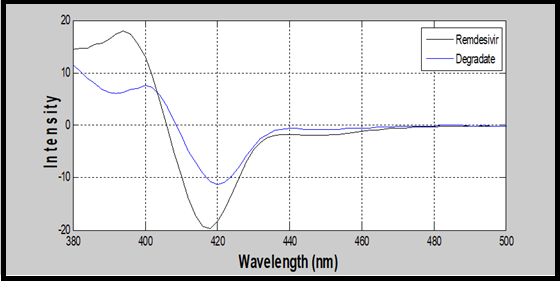


**Figure (11): First derivative synchronous fluorescence spectra of (A) Remdesivir (800 ng/ml) and (B) Remdesivir degradation product (800 ng/ml).**

**
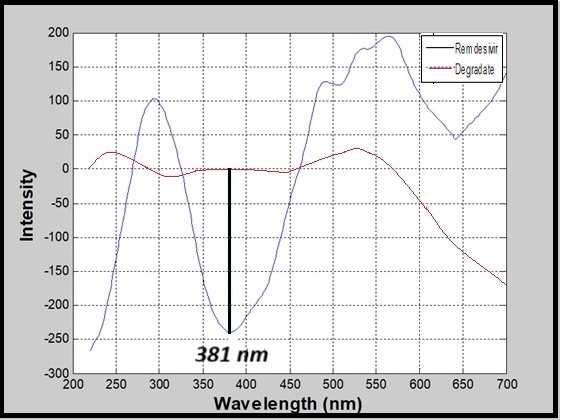
**

**Figure (12): Wavelets synchronous fluorescence spectra of (A) Remdesivir (800 ng/ml) and (B) Remdesivir degradation product (800 ng/ml) .**


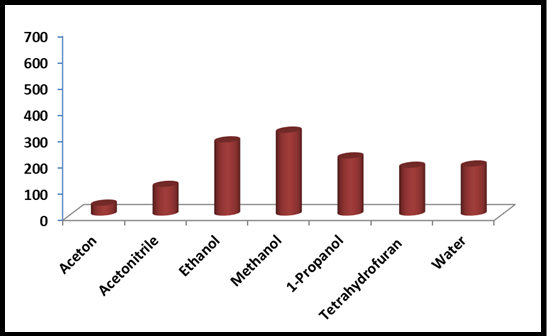


**Figure (13): Effect of different diluting solvents on synchronous fluorescence intensity of Remdesivir (250 ng/ml).**


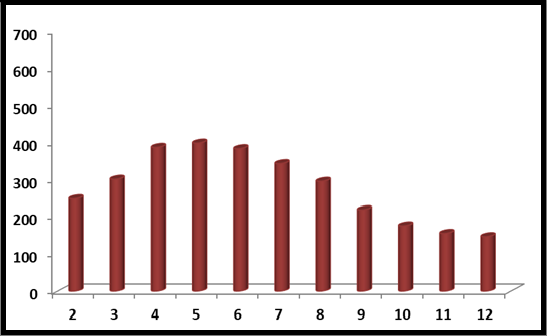


**Figure (14): Effect of pH on synchronous fluorescence intensity of Remdesivir (250 ng/ml).**

**
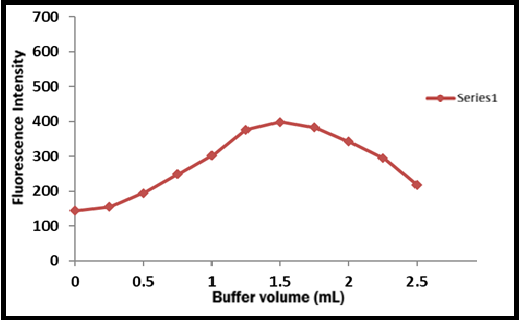
**

**Figure (15): Effect of Britton Robinson buffer volume (pH 5) on synchronous fluorescence intensity of Remdesivir (800 ng/ml).**


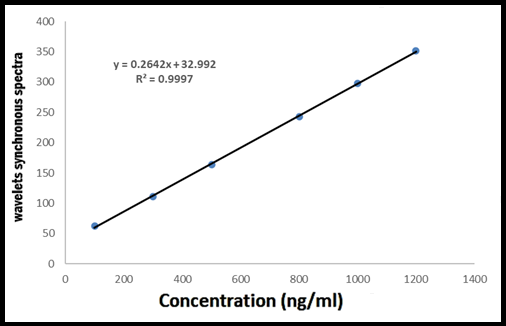


**Figure (16): Calibration graph of Remdesivir by the proposed wavelets synchronous spectrofluorimetric method.**

**Table (1): Regression and validation data for the determination of Remdesivir by the proposed wavelets synchronous spectrofluorimetric procedure:**

| **Parameters** | **Proposed method** |
| --- | --- |
| Wavelength (nm) | 381 |
| Linearity range (ng/ml) | 100 ─ 1200 |
| LOD (ng/ml) | 28.234 |
| LOQ (ng/ml) | 93.172 |
| **Regression Equation**  **-** Slope (*b*)  **-** Intercept (*a*) | *y* a = *b x* b + *a*  0.2642  32.992 |
| Coefficient of determination (r2) | 0.9997 |
| Accuracy (% R)c | 100.21 |
| **Precision**d **(% RSD)**  **-** Repeatability  **-** Intermediate precision | 1.335  1.120 |

a The peak amplitude of the wavelets of synchronous fluorescence spectra.

b Concentration of Remdesivir in ng/ml.

c Average of nine determinations (three concentrations repeated three times).

d %RSD of nine determinations (three concentrations repeated three times).

e Average of three determinations.

**Table (2): Determination of Remdesivir in mixtures with its degradation product by the proposed wavelets synchronous spectrofluorimetric procedure:**

| **Intact**  **(ng/ml)** | **Degradation product (ng/ml)** | **Intact found**  **(ng/ml)** | **%Recovery of intact** |
| --- | --- | --- | --- |
| 1100 | 100 | 1098.57 | 99.87 |
| 900 | 300 | 895.32 | 98.48 |
| 700 | 500 | 694.33 | 99.19 |
| 300 | 900 | 294.18 | 98.06 |
| 100 | 1100 | 101.06 | 101.06 |
| Mean ± %RSD | | | 99.96±1.525 |

**Table (3): Recovery study of Remdesivir by standard addition technique using the proposed wavelets synchronous spectrofluorimetric in Remdesivir® vials:**

| **Pharmaceutical taken (ng/ml)** | **Pharmaceutical found**a **(ng/ml)** | **Pure added (ng/ml)** | **Pure found**b **(ng/ml)** | **Pure recovery (%R)** |
| --- | --- | --- | --- | --- |
| 300 | 298.96 | 100 | 98.48 | 98.48 |
| 300 | 300.27 | 100.09 |
| 500 | 495.65 | 99.13 |
| 800 | 789.36 | 98.67 |
| Mean ± %RSD | | | | 99.09±0.723 |

a Average of five determinations.

b Average of three determinations.

**Table (4): Determination of Remdesivir in Remdesivir® vials by the proposed wavelets synchronous spectrofluorimetric and reported methods:**

| **Parameters** | **Proposed method** | **Reported method** [2] |
| --- | --- | --- |
| **n*** | 5 | 5 |
| Mean % recovery | 98.96 | 99.89 |
| % RSD | 0.779 | 0.6942 |
| Variance | 0.595 | 0.482 |
| Student’s *t*-test** | 2.00 (2.306) | —— |
| *F*-value** | 1.234 (6.388) | —— |

* No. of experiments.

** The values in parenthesis are tabulated values of “*t* ” and “*F* ” at (P = 0.05)
